# Supplementary material for: The “Jack-of-all-Trades” Flagellum From Salmonella and E. coli Was Horizontally Acquired From an Ancestral β-Proteobacterium
Source: Front Microbiol. 2021 Mar 30;12:643180. doi: 10.3389/fmicb.2021.643180 (PMC8042155; doi:10.3389/fmicb.2021.643180)
Supplement: Supplementary file 10 [file Table_1.XLSX]

## Sheet: Sheet1
Species used in Figure 1A
Selenomonas bovis
Thermanaerovibrio acidaminovorans
Glaciecola pallidula
Alteromonas macleodii
Glaciecola psychrophila
Glaciecola mesophila
Catenovulum agarivorans
Algicola sagamiensis
Alishewanella jeotgali
Pseudoalteromonas tunicata
Pseudoalteromonas haloplanktis
Pseudoalteromonas luteoviolacea
Idiomarina loihiensis
Shewanella sediminis
Shewanella oneidensis
Aeromonas veronii
Aeromonas salmonicida
Oceanimonas smirnovii
Moritella dasanensis
Photobacterium leiognathi
Vibrio vulnificus
Vibrio fischeri
Candidatus Photodesmus katoptron
Plesiomonas shigelloides
Photobacterium leiognathi
Shewanella sediminis
Oceanimonas smirnovii
Plesiomonas shigelloides
Pseudomonas aeruginosa
Pseudomonas syringae
Marinobacter manganoxydans
Marinobacter aquaeolei
Marinomonas sp.
Amphritea japonica
Methylobacter tundripaludum
Nitrosococcus oceani
Thiomicrospira crunogena
Thioalkalivibrio sp.
Betaproteobacteria bacterium
Zymomonas mobilis
Octadecabacter arcticus
Candidatus Puniceispirillum marinum
Rhodobacter sphaeroides
Thiobacillus denitrificans
Thiobacillus denitrificans
Methylotenera mobilis
Methylobacillus flagellatus
Escherichia coli
Salmonella enterica Typhimurium
Bordetella avium
Cupriavidus taiwanensis
Burkholderia mallei
Nitrosomonas eutropha
Sideroxydans lithotrophicus
Dechloromonas aromatica
Chitiniphilus shinanonensis
Comamonas testosteroni
Hylemonella gracilis
Pelobacter carbinolicus
Desulfotalea psychrophila
Desulfohalobium retbaense
Geobacter bemidjiensis
Desulfobacterium autotrophicum
Desulfatibacillum alkenivorans
Lawsonia intracellularis
Desulfovibrio alaskensis
Desulfovibrio magneticus
Syntrophus aciditrophicus
Magnetococcus marinus
Thermodesulfovibrio yellowstonii
Rhodopseudomonas palustris
Parvibaculum lavamentivorans
Caulobacter crescentus
Rhodopseudomonas palustris
Hyphomonas neptunium
Rhodobacter sphaeroides
Acidobacterium capsulatum
Campylobacter concisus
Campylobacter jejuni
Campylobacter upsaliensis
Helicobacter hepaticus
Wolinella succinogenes
Nautilia profundicola
Denitrovibrio acetiphilus
Opitutus terrae
Pirellula staleyi
Borrelia burgdorferi
Leptospira biflexa
Thermotoga neapolitana
Halothermothrix orenii
Acetonema longum

## Sheet: Sheet2
Species used in Figures 1B and C
Campylobacter_jejuni
Thioalkalkalivibrio_sp
Shewanella_oneidensis
Shewanella_sediminis
Oceanimonas_smirnovii
Aeromonas_salmonicida
Aeromonas_veronii
Photobacterium_leiognathi
Vibrio_fischeri
Vibrio_vulnificus
Plesiomonas_shigelloides
Pseudoalteromonas_atlantica
Glaciecola_psychrophila
Alteromonas_macleodii
Glaciecola_nitratireducens
Catenovulum_agarivorans
Pseudoalteromonas_luteoviolacea
Pseudoalteromonas_haloplankti
Plesiomonas_shigelloides
Shewanella_sediminis
Photobacterium_leiognathi
Oceanimonas_smirnovii
Aeromonas_salmonicida
Aeromonas_veronii
Pseudomonas_syringae
Pseudomonas_aeruginosa
Marinomonas_sp
Marinobacter_hydrocarbonclasticus
Marinobacter_adhaerens
Nitrosococcus_oceani
Methylobacter_tundripaludum
Chitiniphilus_shinanonensis
Hylemonella_gracilis
Comamonas_testosteroni
Dechloromonas_aromatica
Sideroxydans_lithotrophicus
Nitrosomonas_eutropha
Thiobacilus_denitificans
Methylotenera_mobilis
Methylobacilus_flagellatus
Cupriavidus_taiwanensis
Burkholderia_mallei
Bordetella_avium
Bordetella_bronchiseptica
Morganella_morganii
Yersinia_pestis
Serratia_marcescens
Edwardsiella_ictaluri
Enterobacter_cloacae
Salmonella_enterica
Shigella_flexneri
Escherichia_coli
